# Supplementary material for: A global daily gap-filled chlorophyll-a dataset in open oceans during 2001–2021 from multisource information using convolutional neural networks
Source: Copernicus journal article supplement (doi:10.5194/essd-2023-257), 2023-07-10
Supplement: Supplementary file [file essd-2023-257-AC1-supplement.pdf]

## Response to referee comment 2

Comment:

This manuscript describes a large dataset from 2001-2021 for global daily gap filled chlorophyll-a. The authors developed a convolutional neural network called OCNET to reconstruct global chlorophyll-a concentration in open oceans. This dataset is very useful and important for the scientific community. The manuscript in general is well written, but would benefit from some minor clarifications, and adjustments before publication.

Response: Thanks for thoroughly reviewing the manuscript and making such encouraging comments. It is important for us to receive these feedbacks to further improve the data set and the manuscript. Comments and issues mentioned in referee comment 2 have been addressed and are illustrated as follows.

General Comments:

In line 155, the authors stated that they excluded regions from seas with surface salinities below 25. On the other hand, the minimum value of salinity shown in table 2 is 0. How? Please clarify this in the text. According to ESSD, the DOI of the dataset and its in-text citation must be given in the abstract (<https://www.earth-system-science-data.net/submission.html>). Please add them. Please Provide more details in section 5 (data availability section) about the dataset which is very relevant for a data description paper. For example, you can explain how are the data organized in different files (per year or ..), and how are the files named (chl\_OCNET\_.. followed by Date (day, month, year). What are the type of files (".asc", or ".csv".. etc) , separator (if any)... etc

Response:

Thanks for this comment. When defining the open ocean areas, we used the multi-year mean of WOA2013 data as the reference and selected regions where salinity is greater than 25 PSU. However, it is important to note that the seasonal and interannual variations in salinity in these regions may not always exceed 25 PSU. It should be emphasized that, to establish the study boundaries, it is not a strict requirement for salinity to always exceed 25 PSU, but rather for the mean value to meet this criterion.

Furthermore, the study utilized salinity data from the Ocean Reanalysis System 5, and according to the documentation for this dataset, the minimum salinity value is 0. Therefore, in Table 2, the salinity is described as having a minimum value of 0.

Thanks for the comment about the dataset information. The DOI for the dataset will be added in the abstract, and any updates to the dataset will be provided through the same link. Please refer to the instructions on the dataset's publishing website for details (the data sets are available online with a DOI: <https://doi.org/10.5281/zenodo.10011908>).

Initially, the first version of the dataset was released in ASC format with daily data files. Due to the high volume of files in the first version, we have opted to release a new version and have converted the data into netCDF files. In the second version, each file corresponds to one year of data, and the respective year is indicated in the file name. Information regarding data format, latitude and longitude, handling of missing values, units, and other data specifications has been incorporated into the netCDF files.

Modifications: The source of the minimum value is added in title of Table 2. DOI of new version of OCNET dataset was updated in abstract and section 5.

#### Specific Comments:

1) Line 15 in the abstract: missing data not “data missing”

Response:

Thanks for this comment. It will be corrected in the revised manuscript.

2) Line 24 in the abstract: phytoplankton biomass not “phytoplankton mass”

Response:

Thanks for this comment. It will be corrected in the revised manuscript.

3) Line 24-25 in the abstract: The authors state that the “OCNET model achieves good performance in the reconstruction of global ocean Chl-a concentration data... etc.”. We don’t know how the model perform in polar regions or high latitudes (higher than 25) or coastal areas. It would be more precise to use the term “global open ocean”. The sentence should then become as follows: “the OCNET model achieves good performance in the reconstruction of global open ocean Chl-a ... etc.”

Response:

Thanks for this comment. It will be corrected in the revised manuscript.

4) Line 25 in the abstract: “captures temporal variations”. It is recommended to write spatiotemporal.

Response:

Thanks for this comment. It will be corrected in the revised manuscript.

5) Line 125: “Four” not “three” environmental variables

Response:

Thanks for this comment. There is indeed an issue with clarity in the text. What we intended to convey is that the study selected three variables that affect the growth of marine

phytoplankton, namely SST, SAL, and PAR, along with one variable that influences their distribution, namely SSP. SST, SAL, and SSP are derived from reanalysis data, while PAR is obtained from satellite data products. To address this, we have made appropriate revisions to the data description section from lines 125 to 135 to clarify this point.

Modifications: The description of the input data was clarified in lines 133-141.

6) Line 259: add degree (°) to “0.25”

Response:

Thanks for this comment. It will be corrected in the revised manuscript.

7) Please ensure consistency in the terminology used throughout the text and in the figures. For example, in line 333 and 341, the terms 'training set,' 'validation set,' and 'test set' are used, while in Figure 6, they are referred to as 'training set,' 'validating set,' and 'testing set.'

Response:

Thanks for this comment. It will be corrected in the revised manuscript.

Modifications: The terminology used for the training set, validating set, and testing set has been standardized throughout the entire manuscript.

8) Line 346-347: I recommend that you use “compared to” instead of “while”. The statement would become: “Based on the results of the OCNET model, regions 2, 3, and 5 show larger decreasing magnitudes, compared to other regions, which also exhibit a decreasing trend.”

Response:

Thanks for this comment. It will be corrected in the revised manuscript.

9) Line 369-370: I recommend that you use “compared to” instead of “while”. The statement would then be: “From the results of bias, the training set shows a clear tendency of underestimation (Fig. 7d), compared to the validation and testing sets, which exhibit a less pronounced underestimation.

Response:

Thanks for this comment. It will be corrected in the revised manuscript.

10) Line 372: global open ocean Chl-a concentration instead of “global Chl-a concentration”

Response:

Thanks for this comment. It will be corrected in the revised manuscript.

11) I recommend that you change all statements starting with: “it can be seen” or “it can

be observed” and ending with (figure #) to: “By referring to figure #”, or “Figure # indicates/shows .... Etc”. Below are some examples:

*Line 387-388: “It can be seen that the output data of the OCNET model show a similar distribution to NOAA MSL12 data in the global tCC distribution (Fig.8(a–b))”*

*Line 332: “it can be seen that the model performs well (Fig.6)”*

Response:

Thanks for this comment. It will be corrected in the revised manuscript.

Modifications: The statements ending with (figure #) were changed into “referring to figure #”, or “Figure # indicates/shows .... Etc” everywhere.

12) Line 335-336, the authors stated that OCNET performed well but shows poor performance in individual regions, and stated that “region 9, being mostly near the American continent, is heavily influenced by human activities, and the satellite data quality in coastal areas is also poorer...”. Then, in their conclusion (Line 510-512), the authors concluded that “the model's performance was somewhat weaker in the eastern Pacific region compared to other areas. This may be due to specific climate characteristics that have a significant impact on phytoplankton growth and distribution or low quality of satellite-based dataset in this region”. Isn't region 9 supposed to be the eastern Pacific? If yes, then please state the same reasons in both statements, and provide more details or examples on such climate characteristics that are specific to the eastern Pacific.

Response:

Thanks for this comment. In these two sentences, there is indeed a lack of clarity in our statements. In fact, the summaries of these two sections refer to slightly different regions. Region 9 encompasses parts of the Eastern Pacific and the western North Atlantic, all of which are close to the American continent. However, when we mention that "the model performs poorly in the eastern tropical Pacific," it actually refers to the "eastern tropical Pacific," which is closer to the equator (as shown in Figure 7) and should be clarified in the revised manuscript.

Since the OCNET model proposed in the study does not consider the influence of human activities in coastal areas, the poor performance of the model in the coastal regions near the American continent could likely be attributed to human activities. On the other hand, the model's poor performance in the "eastern tropical Pacific" region may be more likely to be affected by specific climate characteristics. These unique climate variations might not be captured by the OCNET model within the relatively short training time span (2018-2021). In fact, the results of the OCNET model for Region 9 during the period of 2018-

2021 closely align with the satellite-merged OCCCI dataset. This suggests that OCNET performs well only within the time frame covered by the target dataset NOAA MSL12, and it exhibits poorer performance in earlier periods (2001-2017).

There are several studies that focus on anomalies in the eastern tropical Pacific. For example, Geng et al. suggest that increased sea surface temperature variability due to global warming may manifest in the eastern Pacific earlier than central Pacific. Duteil et al. discuss the important impact of future changes in atmospheric synoptic variability (ASV) on ocean properties and primary productivity in the eastern tropical Pacific.

Regarding the issue of the model's poor performance in this particular region, we plan to conduct further analysis and exploration in future work. Once again, we appreciate your feedback!

Modifications: In the conclusion section, “eastern Pacific” was changed into “eastern tropical Pacific”. The citations for the two mentioned articles have also been included in the manuscript.

13) Figure 6 shows the evaluation indices of the training, testing and validating sets. Meanwhile, there is no indication to which dataset correspond the evaluation metrics shown in table 4. Although can be inferred by comparison, I recommend that you indicate in the text or table caption that they correspond to the training set. Readers shouldn't guess.

Response:

Thanks for the comment. We indeed omitted an explanation of the datasets included in the evaluation metrics in Table 4. The median values in these metrics represent the median of all evaluation results, including those from the training set, validation set, and test set. Since Figure 6 already provides separate visualizations of the evaluation results for the training set, validation set, and test set using box plots, Table 4 only shows the overall evaluation summary. We have added an explanation to the title of Table 4 to clarify this.

Modifications: The explanation of evaluation metrics in Table 4 was added in lines 339-340.

14) Several References lack DOI. Please add the corresponding DOI. Below are some examples of references lacking DOI:

Behrenfeld, M. J., O'Malley, R. T., Siegel, D. A., McClain, C. R., Sarmiento, J. L., Feldman, G. C., Milligan, A. J., Falkowski, P. G., Letelier, R. M., and Boss, E. S.: Climate-driven trends in contemporary ocean productivity, *Nature*, 444, 752-755, 2006. Chen, S., Hu, C., Barnes, B. B., Xie, Y., Lin, G., and Qiu, Z.: Improving ocean color data coverage through machine learning, *Remote Sensing of Environment*, 222, 286-302, 2019. Groom, S., Sathyendranath, S., Ban, Y., Bernard, S., Brewin, R., Brotas, V., Brockmann, C., Chauhan,

P., Choi, J.-k., Chuprin, A., Ciavatta, S., Cipollini, P., Donlon, C., Franz, B., He, X., Hirata, T., Jackson, T., Kampel, M., Krasemann, H., Lavender, S., Pardo-Martinez, S., Mélin, F., Platt, T., Santoleri, R., Skakala, J., Schaeffer, B., Smith, M., Steinmetz, F., Valente, A., and Wang, M.: Satellite Ocean Colour: Current Status and Future Perspective, *Frontiers in Marine Science*, 6, 485 2019.

Response:

Thanks for the comment. The DOI of all references will be modified in the revised manuscript.
